# Supplementary material for: Cyclic GMP-Dependent Regulation of Vascular Tone and Blood Pressure Involves Cysteine-Rich LIM-Only Protein 4 (CRP4)
Source: MDPI journal article supplement (doi:10.3390/ijms22189925), 2021-09-14
Supplement: s1 [file s1]

## **Cyclic GMP-Dependent Regulation of Vascular Tone and Blood Pressure Involves Cysteine-Rich LIM-Only Protein 4 (CRP4)**

Natalie Längst<sup>1,§</sup>, Julia Adler<sup>1,§</sup>, Olga Schweigert<sup>2,3</sup>, Felicia Kleusberg<sup>1</sup>, Melanie Cruz Santos<sup>1</sup>, Amelie Knauer<sup>1</sup>, Matthias Sausbier<sup>1</sup>, Tanja Zeller<sup>2,3</sup>, Peter Ruth<sup>1,§</sup>, Robert Lukowski<sup>1,§</sup>

*<sup>§</sup>These authors contributed equally to this work*

<sup>1</sup>Department of Pharmacology, Toxicology and Clinical Pharmacy, Institute of Pharmacy, University of Tuebingen, 72076 Tuebingen, Germany

<sup>2</sup>Cardiovascular Systems Medicine and Molecular Translation, University Center of Cardiovascular Science, University Heart & Vascular Center Hamburg, University Medical Center Hamburg-Eppendorf, Clinic of Cardiology, University Heart and Vascular Center, 20251 Hamburg, Germany

<sup>3</sup>DZHK, German Center for Cardiovascular Research, partner site Hamburg/Kiel/Lübeck, 20251 Hamburg, Germany

### <sup>§</sup>Corresponding authors:

Robert Lukowski  
Experimental Pharmacology  
Department of Pharmacology, Toxicology and Clinical Pharmacy  
Institute of Pharmacy  
University of Tübingen  
Tel. +49 7071 29 74550  
Fax +49 7071 29 2476  
E-mail: [robert.lukowski@uni-tuebingen.de](mailto:robert.lukowski@uni-tuebingen.de)

or

Peter Ruth  
Department of Pharmacology, Toxicology and Clinical Pharmacy  
Institute of Pharmacy  
University of Tübingen  
Tel. +49 7071 29 76781  
Fax +49 7071 29 2476  
E-mail: [peter.ruth@uni-tuebingen.de](mailto:peter.ruth@uni-tuebingen.de)

**Supplemental Figures and Legends: 4**

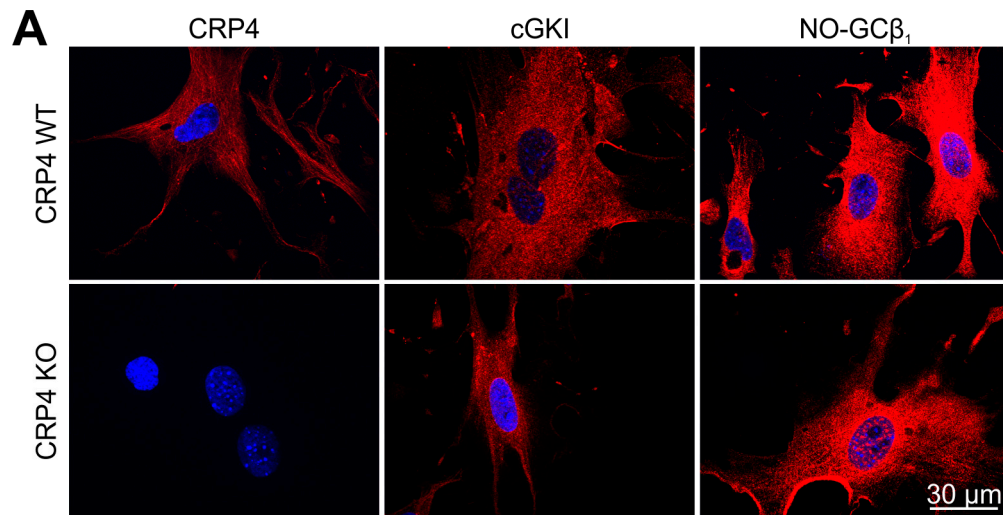

**Figure S1.** Immunofluorescence (IF) analysis of primary VSMCs. CRP4, cGKI and NO-GC $\beta_1$  were consistently detectable by antigen-specific primary antibodies and secondary antibodies coupled to fluorescent dyes in CRP4 WT VSMCs. As expected, CRP4 KO VSMCs remained negative for CRP4, while the cGKI and NO-GC $\beta_1$  expression patterns did not differ substantially between genotypes.

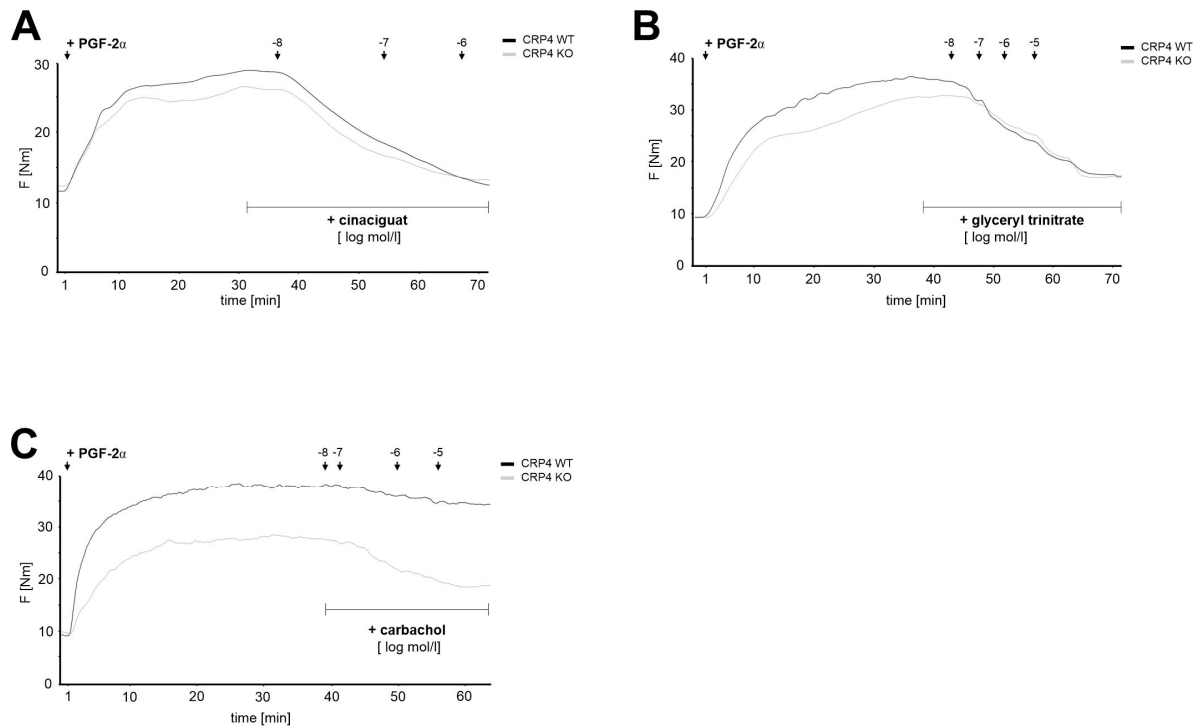

**Figure S2.** Representative raw records of aortic ring segments exposed to different vasoactive agents. Representative basic recordings of vascular tone during vasoconstriction and vasodilation of aortic rings. Dose-dependent relaxation of aortic ring segments was examined upon precontraction with PGF2 $\alpha$  for cinaciguat [0.1 nM to 1  $\mu$ M], glyceryl trinitrate [1 nM to 10 mM] and carbachol [1 nM to 10 mM].

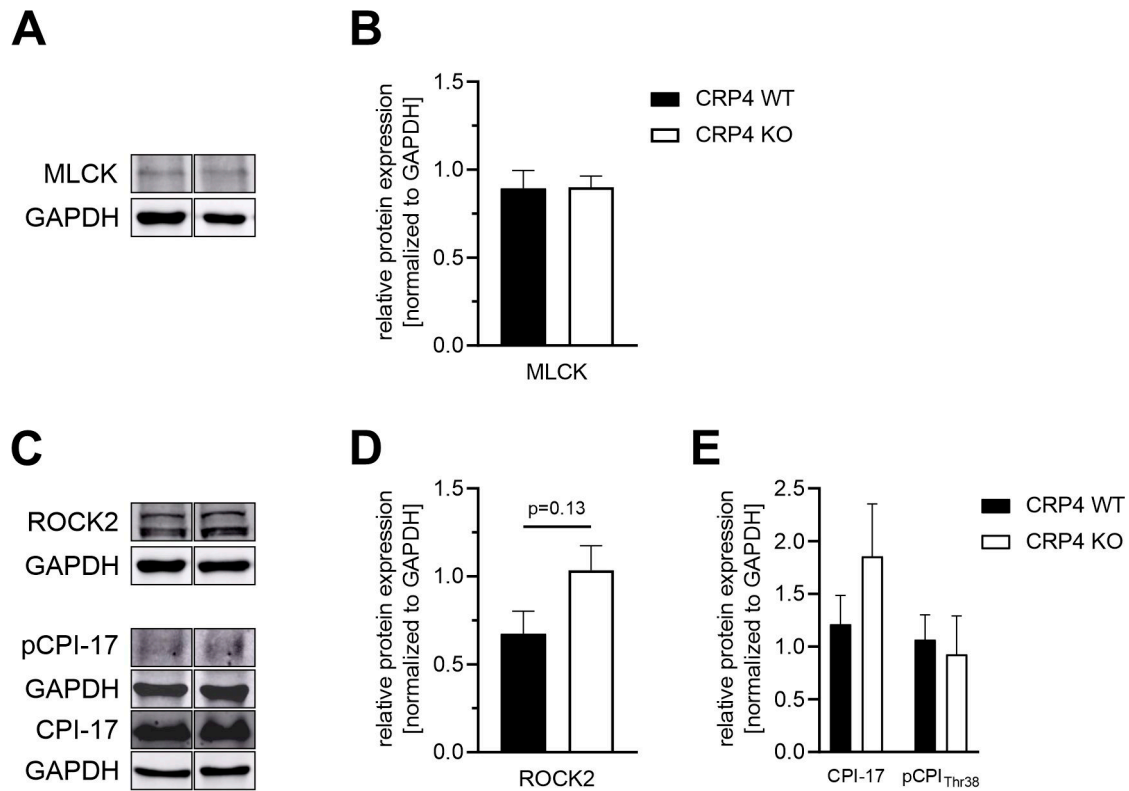

**Figure S3.** Lack of vascular CRP4 did not alter MLCK, ROCK2 and pCPI-17/ pCPI-17. **(A-B)** Western Blot analysis of total myosin light chain kinase (MLCK) in CRP4 WT and KO aorta. **(C-D)** The expression of rho-associated coiled-coil-forming kinase subtype 2 (ROCK2) was slightly, but not significantly, increased in CRP4 deficient aorta, **(E)** while protein kinase C-potentiated protein phosphatase-1 inhibitor (CPI-17) and the activating phosphorylation of CPI-17 at Thr-38 were unaffected by the CRP4 status of the vessel. To demonstrate equal loading of the gels, GAPDH was co-detected in all samples. Data represent means  $\pm$ SEM with n=4 per genotype.

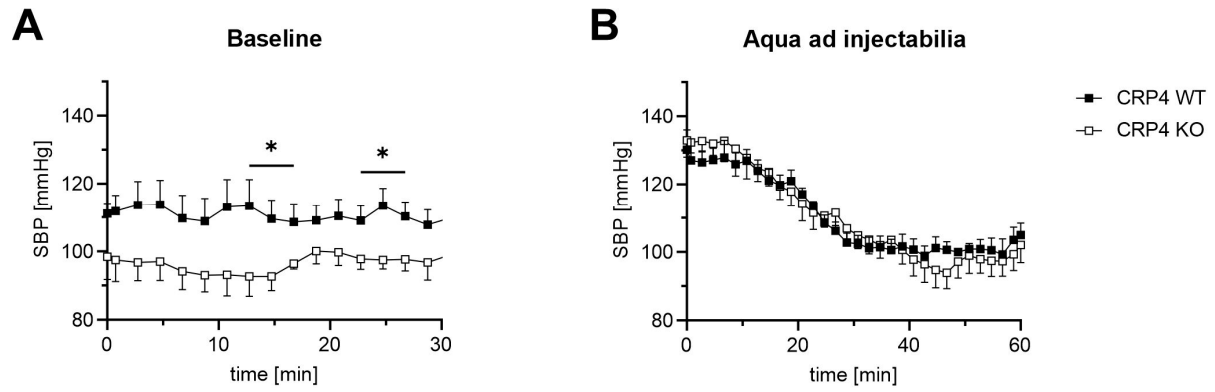

**Figure S4.** Lack of CRP4 does not alter the “stress-induced” BP response. **(A)** Basal vascular tone of CRP4 WT and CRP4 deficient animals analysed by telemetric blood pressure measurements demonstrated a mild hypotonia in CRP4 KO animals. Data represent means  $\pm$ SEM with  $n=8$  per genotype. \* $P<0.05$  represent statistical difference between genotypes, two-tailed students t-test. **(B)** Injection of saline (*aqua ad injectabilia* applied i.p.) reduced the SBP in CRP4 WT and KO animals to a similar extent suggesting that short-term blood pressure responses to pre-experimentation handling and injection, which result in a temporarily “stress-induced” BP increase, are intact in CRP4-deficient animals. Data points represent means  $\pm$ SEM with  $n=4-5$  per genotype.
